# Supplementary material
Source: Copernicus journal article supplement (doi:10.5194/egusphere-2026-3462)
Supplement: Supplementary file 1 [file egusphere-2026-3462-supplement.pdf]

*Supplement of*

**Rapid flood damage estimation tool for urban pluvial floods with scarce data**

Guilherme Samproгна Mohor et al.,

5 *Correspondence to:* Guilherme Samproгна Mohor ([guilherme.samproгна.mohor@uni-potsdam.de](mailto:guilherme.samproгна.mohor@uni-potsdam.de))

## S1. Predictor Variables

The optimization procedure searched at the same time hyperparameter values and the inclusion or exclusion of pre-selected predictor variables.

- 10 Table S1 presents all considered possibilities. To avoid cross-correlation, variables that represent the same construct were tested individually, that is, only one such variable at a time was considered, or none representing that construct. For example, to represent contamination in the flood waters, the options were: (a) none, (b) oil contamination only, or (c) overall contamination score, but never (b) and (c) together.

15 **Table S1. Summary of tested and adopted predictor variables**

| Aspect                   | Variable             | Description                                       | Range                   |                              |                          |
|--------------------------|----------------------|---------------------------------------------------|-------------------------|------------------------------|--------------------------|
|                          |                      |                                                   | Training set<br>(n=367) | Test set<br>(n=184)          | Validation set<br>(n=44) |
| <b>Water Depth *</b>     | Water Depth (wd)     | Maximum water depth outside the house [cm]        | 0 – 300 cm<br>Mean: 25  | 0 – 200 cm<br>Mean: 24       | 0 – 150 cm<br>Mean: 39   |
|                          |                      | Hazard Rating (HR) = water depth*(velocity + 0.5) | 0 – 2<br>Median: 0      | 0 – 2<br>Median: 0           | 0 – 2<br>Median: 1       |
| <b>Flood Intensity *</b> | Flood Intensity (fi) | DEFRA classes                                     | HR split                | Surveyed classes             | (adopted)                |
|                          |                      | Low                                               | $0 < HR < 0.75$         | 0: “Could easily stand”      |                          |
|                          |                      | Medium                                            | $0.75 < HR < 1.25$      | 1: “Would struggle to stand” |                          |
|                          |                      | High                                              | $1.25 < HR < 2.5$       | 2: “Would                    |                          |
|                          |                      | Extreme                                           | $2.5 < HR$              | 2: “Would                    |                          |

have been  
carried away”  
OR  
”Water was  
too deep to  
stand”

|                                          |                                                                  |                                                                                                                            |                                                        |                                                      |                                                      |
|------------------------------------------|------------------------------------------------------------------|----------------------------------------------------------------------------------------------------------------------------|--------------------------------------------------------|------------------------------------------------------|------------------------------------------------------|
| <b>Contamination<br/>in flood waters</b> | Contamination<br>with heating oil<br>(con_oil)                   | Indicator of contamination in the floodwater:<br>0=no contamination to 1=heavy contamination<br>with heating oil [-]       | y/n<br>Mean: 3%                                        | y/n<br>Mean: 4%                                      | y/n<br>Mean: 14%                                     |
|                                          | Contamination<br>score                                           | Indicator of contamination in the floodwater:<br>0=no contamination to 2=heavy contamination<br>[-] (Thieken et al., 2005) | 0 – 2<br>Median: 0                                     | 0 – 2<br>Median: 0                                   | 0 – 2<br>Median: 0                                   |
| <b>Building size</b>                     | Floor Space (fs)                                                 | Floor space of the whole building [m <sup>2</sup> ]                                                                        | 50 – 12,000 m <sup>2</sup><br>Mean: 239 m <sup>2</sup> | 55 – 4900 m <sup>2</sup><br>Mean: 222 m <sup>2</sup> | 30 – 1100 m <sup>2</sup><br>Mean: 216 m <sup>2</sup> |
|                                          | Building footprint                                               | Footprint of the building [m <sup>2</sup> ]                                                                                | 30 – 13,000 m <sup>2</sup><br>Mean: 180 m <sup>2</sup> | 55 – 4900 m <sup>2</sup><br>Mean: 138 m <sup>2</sup> | 15 – 165 m <sup>2</sup><br>Mean: 73 m <sup>2</sup>   |
|                                          | Number of floors<br>(AND Building<br>footprint)                  | Number of floors besides cellar [#] (included in<br>the model alongside building footprint)                                | 1 – 12<br>Median: 2                                    | 1 – 7<br>Median: 2                                   | 1 – 4<br>Median: 2                                   |
|                                          | Floor space AND<br>Building footprint                            | -                                                                                                                          | -                                                      | -                                                    | -                                                    |
|                                          | Floor space AND<br>Building footprint<br>AND Number of<br>floors | -                                                                                                                          | -                                                      | -                                                    | -                                                    |
| <b>Underground<br/>floor</b>             | Cellar (cel)                                                     | Presence of a cellar [y/n]                                                                                                 | y/n<br>Mean: 97%                                       | y/n<br>Mean: 95%                                     | y/n<br>Mean: 70 %                                    |
|                                          | Flag: only cellar                                                | Among the flooded floors, only the cellar was                                                                              | y/n                                                    | y/n                                                  | y/n                                                  |

|                                                             |                   |                                                    |           |           |           |
|-------------------------------------------------------------|-------------------|----------------------------------------------------|-----------|-----------|-----------|
|                                                             | was flooded       | reported as flooded                                | Mean: 87% | Mean: 86% | Mean: 55% |
|                                                             | Flag: negative    | When the reported highest level of water inside    | y/n       | y/n       | y/n       |
|                                                             | water depth       | the house in relation to ground level is negative, | Mean: 84% | Mean: 83% | Mean: 41% |
|                                                             | inside the house  | implying only underground floor was affected       |           |           |           |
|                                                             | in relation to    |                                                    |           |           |           |
|                                                             | ground level      |                                                    |           |           |           |
|                                                             | Flag: water depth | 'wd' is very low, represented as binay variable    | y/n       | y/n       | y/n       |
|                                                             | outside the house |                                                    | Mean: 34% | Mean: 32% | Mean: 25% |
|                                                             | is low <5cm       |                                                    |           |           |           |
|                                                             | Flag: water depth | 'wd' is zero, represented as binay variable        | y/n       | y/n       | y/n       |
|                                                             | outside the house |                                                    | Mean: 27% | Mean: 21% | Mean: 18% |
|                                                             | is zero           |                                                    |           |           |           |
| <b>Property-Level<br/>Precautionary<br/>Measures (plpm)</b> | PLPM score        | Score of implemented precautionary measures        | 0 – 48    | 0 – 47    | 0 – 36    |
|                                                             |                   | at the property, from 0 up to 48 (Laudan et al.,   | Median: 6 | Median: 6 | Median: 1 |
|                                                             |                   | 2020; Thicken et al., 2008) [-]                    |           |           |           |
|                                                             |                   |                                                    |           |           |           |
|                                                             | Backflow          | Installed a backflow preventer                     | y/n       | y/n       | y/n       |
|                                                             | preventer         |                                                    | Mean: 27% | Mean: 29% | Mean: 25% |
|                                                             | Water barrier     | Installed a fixed or mobile water barrier          | y/n       | y/n       | y/n       |
|                                                             |                   |                                                    | Mean: 5%  | Mean: 8%  | Mean: 5%  |
|                                                             | Backflow          | Either measure                                     | y/n       | y/n       | y/n       |
|                                                             | preventer OR      |                                                    | Mean: 29% | Mean: 32% | Mean: 27% |
|                                                             | Water barrier     |                                                    |           |           |           |
| <b>Building age</b>                                         | Building Year     | Year of construction in classes: [-]               | 1 – 5     | 1 – 5     | 1 – 5     |
|                                                             | (by) class        | 1: until 1924; 2: 1925-1948; 3: 1949-1964; 4:      | Median: 4 | Median: 4 | Median: 1 |
|                                                             |                   | 1964-1990; 5: after 1990                           |           |           |           |

\* wd and fi were always included.

## References

- 20 Laudan, J., Zöller, G., and Thielen, A. H.: Flash floods versus river floods – a comparison of psychological impacts and implications for precautionary behaviour, *Nat. Hazards Earth Syst. Sci.*, 20, 999–1023, <https://doi.org/10.5194/nhess-20-999-2020>, 2020.
- Thielen, A. H., Müller, M., Kreibich, H., and Merz, B.: Flood damage and influencing factors: New insights from the August 2002 flood in Germany, *Water Resour. Res.*, 41, 2005WR004177, <https://doi.org/10.1029/2005WR004177>, 2005.
- 25 Thielen, A. H., Olschewski, A., Kreibich, H., Kobsch, S., and Merz, B.: Development and evaluation of FLEMOps – a new Flood Loss Estimation Model for the private sector, in: Flood Recovery, Innovation and Response I, FLOOD RECOVERY, INNOVATION AND RESPONSE 2008, 315–324, <https://doi.org/10.2495/FRIAR080301>, 2008.
